# Supplementary material for: Measuring the Quality of University Lectures: Development and Validation of the Instructional Skills Questionnaire (ISQ)
Source: PLoS One. 2016 Feb 26;11(2):e0149163. doi: 10.1371/journal.pone.0149163 (PMC4769345; doi:10.1371/journal.pone.0149163)
Supplement: S3 Table — (XLSX) [file pone.0149163.s003.xlsx]

## Sheet: Blad1
S3 Table. ISQ reliability on student level - measurement occasion one, two and three
	T1		T2		T3
	α		α		α
ISQ scale
Structure	0.713		0.736		0.752
Explication	0.581		0.683		0.729
Stimulation	0.767		0.763		0.792
Validation	0.665		0.666		0.736
Instruction	0.593		0.57		0.624
Comprehension	0.487		0.498		0.558
Activation	0.701		0.73		0.727
Learning Outcomes
Cognition	0.713		0.736
Affection	0.487		0.498
Regulation	0.701		0.73
Notes: T1 = measurement occasion one, T2 = measurement occasion two, T3 = measurement occasion three. α = Cronbach’s alpha.
